# Supplementary material for: Using Machine-Learning to Assess the Prognostic Value of Early Enteral Feeding Intolerance in Critically Ill Patients: A Retrospective Study
Source: MDPI journal article supplement (doi:10.3390/nu15122705), 2023-06-10
Supplement: s1 [file s1]

---

# Using Machine-Learning to Assess the Prognostic Value of Early Enteral Feeding Intolerance in Critically Ill Patients: A Retrospective Study

Orit Raphaeli <sup>1,2,3,\*</sup>, Liran Statlender <sup>4</sup>, Chen Hajaj <sup>1,3</sup>, Itai Bendavid <sup>4</sup>, Anat Goldstein <sup>1,3</sup>, Eyal Robinson <sup>4</sup> and Pierre Singer <sup>2,4</sup>

<sup>1</sup> Industrial Engineering and Management, Ariel University, Ariel 40700, Israel

<sup>2</sup> Institute for Nutrition Research, Beilinson Hospital, Rabin Medical Center, Petah Tikva 4941492, Israel

<sup>3</sup> Data Science and Artificial Intelligence Research Center, Ariel University, Ariel 40700, Israel

<sup>4</sup> Intensive Care Unit, Beilinson Hospital, Rabin Medical Center, Petah Tikva 4941492, Israel

\* Correspondence: oritr@ariel.ac.il; Tel.: +972-546730795

## Supplementary materials

### Supplementary material 1. Correlation heatmap

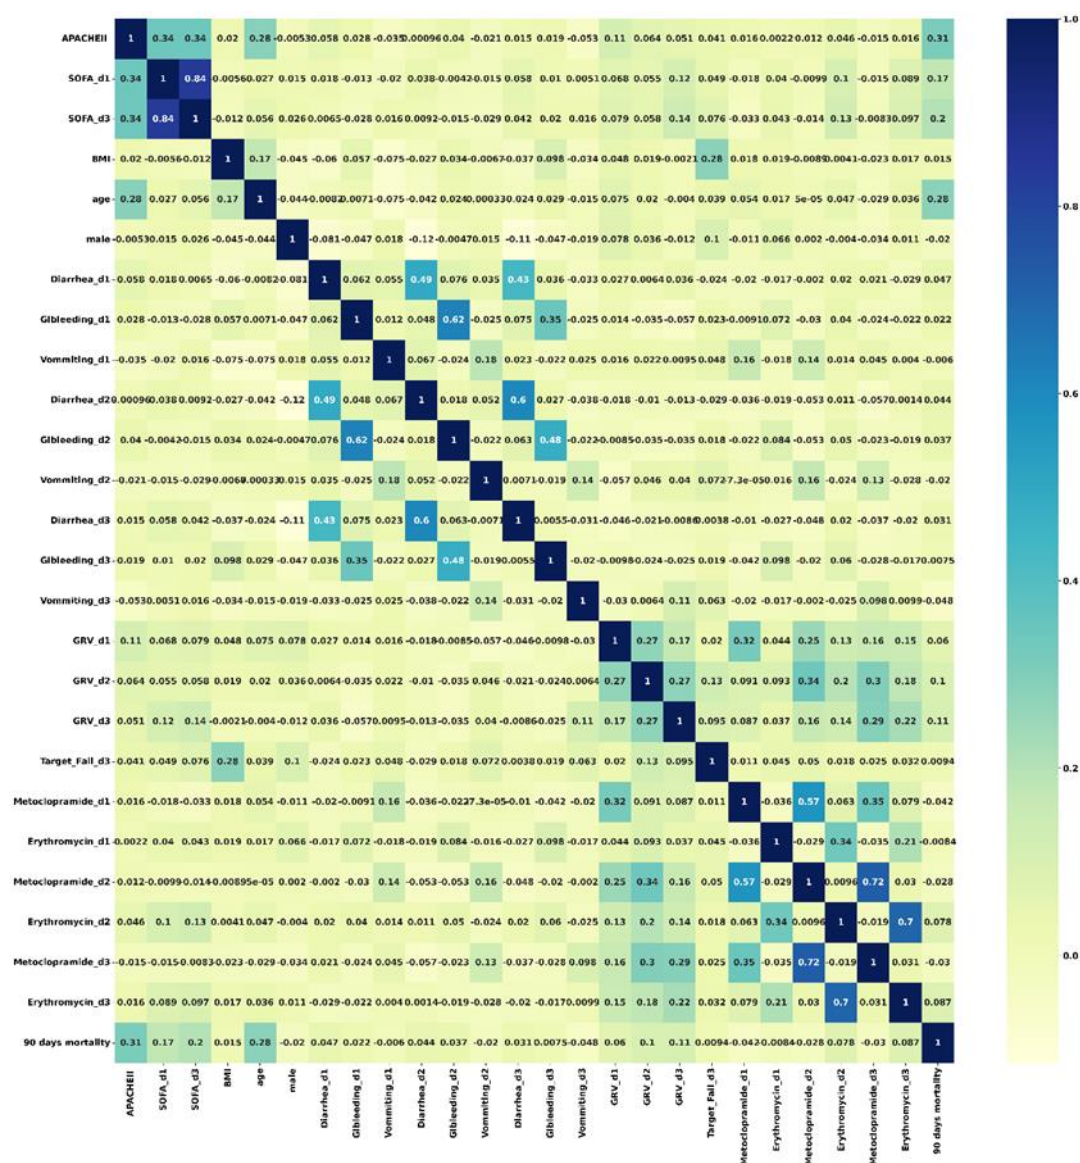

Figure S1. Correlation heatmap between study features and 90-day mortality

## Supplementary material 2. Predictive performance of secondary outcomes

Table S1: Predictive performance of 28-day mortality models

|                                                 | Accuracy<br>(SD) | Precision<br>(SD) | Recall<br>(SD) | Specificity<br>(SD) | F1 (SD)        | AUCROC<br>(95% CI)  |
|-------------------------------------------------|------------------|-------------------|----------------|---------------------|----------------|---------------------|
| <b>Features within 72 h after ICU admission</b> |                  |                   |                |                     |                |                     |
| Gradient boosting Classifier                    | 0.70 (0.02)      | 0.50 (0.09)       | 0.30<br>(0.06) | 0.87 (0.03)         | 0.37<br>(0.06) | 0.71<br>(0.69-0.72) |
| Logistic Regression                             | 0.73 (0.03)      | 0.59 (0.11)       | 0.31<br>(0.06) | 0.90 (0.03)         | 0.40<br>(0.07) | 0.71<br>(0.67-0.74) |
| Random Forest Classifier                        | 0.71 (0.02)      | 0.51 (0.06)       | 0.30<br>(0.07) | 0.88 (0.02)         | 0.37<br>(0.07) | 0.69<br>(0.66-0.71) |
| AdaBoost Classifier                             | 0.70 (0.04)      | 0.50 (0.07)       | 0.36<br>(0.07) | 0.85 (0.03)         | 0.41<br>(0.06) | 0.67<br>(0.62-0.71) |
| KN neighbors Classifier                         | 0.69 (0.03)      | 0.48 (0.09)       | 0.35<br>(0.07) | 0.84 (0.02)         | 0.40<br>(0.07) | 0.67<br>(0.63-0.70) |
| XGB Classifier                                  | 0.68 (0.03)      | 0.47 (0.05)       | 0.39<br>(0.06) | 0.81 (0.03)         | 0.42<br>(0.04) | 0.66<br>(0.63-0.68) |
| Decision Tree Classifier                        | 0.63 (0.04)      | 0.39 (0.07)       | 0.42<br>(0.07) | 0.72 (0.03)         | 0.40<br>(0.07) | 0.57<br>(0.52-0.61) |
| <b>Baseline comparator: APACHE II</b>           |                  |                   |                |                     |                |                     |
| Logistic Regression                             | 0.70 (0.03)      | 0.57 (0.12)       | 0.14<br>(0.04) | 0.75 (0.01)         | 0.22<br>(0.05) | 0.69<br>(0.66-0.71) |

Table S2: Predictive performance of hospital mortality models

|                                                 | Accuracy<br>(SD) | Precision<br>(SD) | Recall<br>(SD) | Specificity<br>(SD) | F1 (SD)        | AUCROC (95% CI)     |
|-------------------------------------------------|------------------|-------------------|----------------|---------------------|----------------|---------------------|
| <b>Features within 72 h after ICU admission</b> |                  |                   |                |                     |                |                     |
| Gradient Boosting Classifier                    | 0.68 (0.02)      | 0.57 (0.05)       | 0.47<br>(0.04) | 0.80 (0.02)         | 0.51<br>(0.03) | 0.72<br>(0.70-0.74) |
| Random Forest Classifier                        | 0.69 (0.03)      | 0.60<br>(0.05)    | 0.44<br>(0.04) | 0.83 (0.03)         | 0.51<br>(0.04) | 0.72<br>(0.69-0.74) |
| Logistic Regression                             | 0.68 (0.03)      | 0.58 (0.09)       | 0.39<br>(0.05) | 0.84 (0.03)         | 0.47<br>(0.06) | 0.72<br>(0.69-0.74) |
| AdaBoost Classifier                             | 0.67 (0.02)      | 0.56 (0.07)       | 0.42<br>(0.03) | 0.81 (0.04)         | 0.48<br>(0.03) | 0.70<br>(0.66-0.73) |
| KN neighbors Classifier                         | 0.67 (0.04)      | 0.55 (0.05)       | 0.43<br>(0.05) | 0.80 (0.04)         | 0.48<br>(0.05) | 0.68<br>(0.64-0.71) |
| XGB Classifier                                  | 0.66 (0.03)      | 0.53 (0.07)       | 0.45<br>(0.05) | 0.78 (0.04)         | 0.48<br>(0.05) | 0.67<br>(0.63-0.70) |
| Decision Tree Classifier                        | 0.61 (0.03)      | 0.46 (0.06)       | 0.47<br>(0.04) | 0.69 (0.04)         | 0.46<br>(0.04) | 0.58<br>(0.55-0.60) |
| <b>Baseline comparator: APACHE II</b>           |                  |                   |                |                     |                |                     |
| Logistic Regression                             | 0.69 (0.03)      | 0.62 (0.08)       | 0.33<br>(0.07) | 0.88 (0.03)         | 0.42<br>(0.07) | 0.70<br>(0.66-0.73) |

Table S3: Predictive performance of ICU mortality models

|                                                 | Accuracy<br>(SD) | Precision<br>(SD) | Recall<br>(SD) | Specificity<br>(SD) | F1 (SD)        | AUCROC<br>(95% CI)  |
|-------------------------------------------------|------------------|-------------------|----------------|---------------------|----------------|---------------------|
| <b>Features within 72 h after ICU admission</b> |                  |                   |                |                     |                |                     |
| Gradient Boosting Classifier                    | 0.77 (0.03)      | 0.57 (0.08)       | 0.29<br>(0.07) | 0.93 (0.02)         | 0.37<br>(0.07) | 0.73<br>(0.69-0.76) |
| Random Forest Classifier                        | 0.77 (0.01)      | 0.57 (0.10)       | 0.22<br>(0.05) | 0.94 (0.01)         | 0.31<br>(0.06) | 0.72<br>(0.67-0.76) |
| Logistic Regression                             | 0.78 (0.01)      | 0.61 (0.09)       | 0.23<br>(0.04) | 0.95 (0.01)         | 0.33<br>(0.05) | 0.72<br>(0.68-0.75) |
| AdaBoost Classifier                             | 0.74 (0.03)      | 0.45 (0.07)       | 0.28<br>(0.06) | 0.89 (0.02)         | 0.34<br>(0.06) | 0.69<br>(0.64-0.73) |
| XGB Classifier                                  | 0.74 (0.02)      | 0.47 (0.07)       | 0.32<br>(0.06) | 0.88 (0.02)         | 0.38<br>(0.06) | 0.69<br>(0.65-0.72) |
| KN neighbors Classifier                         | 0.74 (0.01)      | 0.43 (0.10)       | 0.25<br>(0.06) | 0.89 (0.02)         | 0.31<br>(0.07) | 0.66<br>(0.61-0.70) |
| Decision Tree Classifier                        | 0.70 (0.03)      | 0.38 (0.05)       | 0.38<br>(0.04) | 0.80 (0.03)         | 0.38<br>(0.04) | 0.59<br>(0.56-0.61) |
| <b>Baseline comparator: APACHE II</b>           |                  |                   |                |                     |                |                     |
| Logistic Regression                             | 0.76 (0.01)      | 0.60 (0.24)       | 0.07<br>(0.03) | 0.78 (0.01)         | 0.13<br>(0.05) | 0.70<br>(0.64-0.75) |

Table S4: Predictive performance of long ICU stay (ICU-LOS&gt;7 days) models

|                                                 | Accuracy<br>(SD) | Precision<br>(SD) | Recall<br>(SD) | Specificity<br>(SD) | F1 (SD)        | AUCROC<br>(95% CI)  |
|-------------------------------------------------|------------------|-------------------|----------------|---------------------|----------------|---------------------|
| <b>Features within 72 h after ICU admission</b> |                  |                   |                |                     |                |                     |
| Random Forest Classifier                        | 0.63 (0.03)      | 0.67 (0.03)       | 0.86<br>(0.02) | 0.18 (0.03)         | 0.76<br>(0.02) | 0.57<br>(0.54-0.59) |
| Logistic Regression                             | 0.66 (0.03)      | 0.67 (0.03)       | 0.95<br>(0.02) | 0.09 (0.02)         | 0.79<br>(0.02) | 0.57<br>(0.51-0.62) |
| Gradient Boosting Classifier                    | 0.65 (0.02)      | 0.68 (0.03)       | 0.90<br>(0.02) | 0.15 (0.03)         | 0.77<br>(0.02) | 0.55<br>(0.51-0.58) |
| AdaBoost Classifier                             | 0.64 (0.03)      | 0.67 (0.03)       | 0.88<br>(0.02) | 0.16 (0.04)         | 0.76<br>(0.02) | 0.54<br>(0.49-0.58) |
| XGB Classifier                                  | 0.62 (0.02)      | 0.69 (0.03)       | 0.78<br>(0.03) | 0.30 (0.05)         | 0.73<br>(0.02) | 0.54<br>(0.51-0.56) |
| Decision Tree Classifier                        | 0.57 (0.02)      | 0.68 (0.02)       | 0.67<br>(0.02) | 0.37 (0.03)         | 0.67<br>(0.02) | 0.52<br>(0.49-0.54) |
| KN neighbors Classifier                         | 0.60 (0.03)      | 0.66 (0.02)       | 0.79<br>(0.04) | 0.21 (0.03)         | 0.72<br>(0.02) | 0.49<br>(0.45-0.52) |
| <b>Baseline comparator: APACHE II</b>           |                  |                   |                |                     |                |                     |
| Logistic Regression                             | 0.66 (0.02)      | 0.66 (0.02)       | 0.55<br>(0.06) | 0.22 (0.03)         | 0.80<br>(0.02) | 0.52<br>(0.47-0.56) |

*Supplementary material 3. Predictive performance of early EN failure*

Table S5: Predictive performance of early EN failure

|                                                 | Accuracy<br>(SD) | Precision<br>(SD) | Recall<br>(SD) | Specificity<br>(SD) | F1 (SD)        | AUCROC<br>(95% CI)  |
|-------------------------------------------------|------------------|-------------------|----------------|---------------------|----------------|---------------------|
| <b>Features within 24 h after ICU admission</b> |                  |                   |                |                     |                |                     |
| Gradient Boosting Classifier                    | 0.67 (0.03)      | 0.69 (0.04)       | 0.88<br>(0.02) | 0.29<br>(0.04)      | 0.77<br>(0.03) | 0.69<br>(0.65-0.72) |
| Logistic Regression                             | 0.67 (0.03)      | 0.71 (0.03)       | 0.80<br>(0.04) | 0.42<br>(0.05)      | 0.75<br>(0.03) | 0.69<br>(0.65-0.72) |
| AdaBoost Classifier                             | 0.66 (0.04)      | 0.70 (0.04)       | 0.82<br>(0.02) | 0.37<br>(0.06)      | 0.75<br>(0.03) | 0.68<br>(0.64-0.71) |
| Random Forest Classifier                        | 0.65 (0.04)      | 0.71 (0.05)       | 0.79<br>(0.03) | 0.42<br>(0.05)      | 0.74<br>(0.04) | 0.67<br>(0.62-0.71) |
| XGB Classifier                                  | 0.63 (0.04)      | 0.70 (0.07)       | 0.75<br>(0.03) | 0.42<br>(0.07)      | 0.72<br>(0.04) | 0.64<br>(0.60-0.67) |
| Decision Tree Classifier                        | 0.62 (0.03)      | 0.68 (0.04)       | 0.78<br>(0.02) | 0.33<br>(0.06)      | 0.73<br>(0.03) | 0.60<br>(0.56-0.63) |
| KN neighbors Classifier                         | 0.60 (0.03)      | 0.69 (0.02)       | 0.70<br>(0.04) | 0.43<br>(0.03)      | 0.69<br>(0.03) | 0.56<br>(0.52-0.59) |
| <b>Features within 48 h after ICU admission</b> |                  |                   |                |                     |                |                     |
| Gradient Boosting Classifier                    | 0.69 (0.03)      | 0.73 (0.03)       | 0.82<br>(0.05) | 0.46<br>(0.05)      | 0.77<br>(0.03) | 0.71<br>(0.67-0.74) |
| Logistic Regression                             | 0.68 (0.04)      | 0.71 (0.05)       | 0.87<br>(0.02) | 0.36<br>(0.07)      | 0.78<br>(0.03) | 0.71<br>(0.67-0.74) |
| Ada Boost Classifier                            | 0.68 (0.03)      | 0.71 (0.04)       | 0.84<br>(0.03) | 0.40<br>(0.03)      | 0.77<br>(0.03) | 0.70<br>(0.66-0.73) |
| Random Forest Classifier                        | 0.66 (0.03)      | 0.70 (0.03)       | 0.82<br>(0.03) | 0.38<br>(0.06)      | 0.75<br>(0.02) | 0.68<br>(0.64-0.71) |
| XGB Classifier                                  | 0.64 (0.01)      | 0.70 (0.04)       | 0.75<br>(0.02) | 0.44<br>(0.05)      | 0.73<br>(0.01) | 0.65<br>(0.63-0.66) |
| KN neighbors Classifier                         | 0.62 (0.02)      | 0.68 (0.03)       | 0.77<br>(0.04) | 0.35<br>(0.05)      | 0.72<br>(0.02) | 0.60<br>(0.55-0.64) |
| Decision Tree Classifier                        | 0.59 (0.03)      | 0.68 (0.05)       | 0.67<br>(0.02) | 0.44<br>(0.06)      | 0.67<br>(0.03) | 0.56<br>(0.53-0.58) |
| <b>Baseline comparator: APACHE II</b>           |                  |                   |                |                     |                |                     |
| Logistic Regression                             | 0.64 (0.03)      | 0.64 (0.03)       | 1.00<br>(nan)) | 0.00<br>(nan)       | 0.78<br>(0.02) | 0.52<br>(0.48-0.55) |
